# Supplementary material for: Comparison of the Proteomes and Phosphoproteomes of S. cerevisiae Cells Harvested with Different Strategies
Source: MDPI journal article supplement (doi:10.3390/proteomes11040028), 2023-09-27

(A)

| Conditions           | Phosphorylation events increasing | Phosphorylation events decreasing |
|----------------------|-----------------------------------|-----------------------------------|
| Hi./Lo. speed        | 18                                | 13                                |
| Hi speed/filtration  | 100                               | 175                               |
| Lo. speed/filtration | 42                                | 103                               |

$\log_2 F_c$  0.75  
p-value < 0.05

(B)

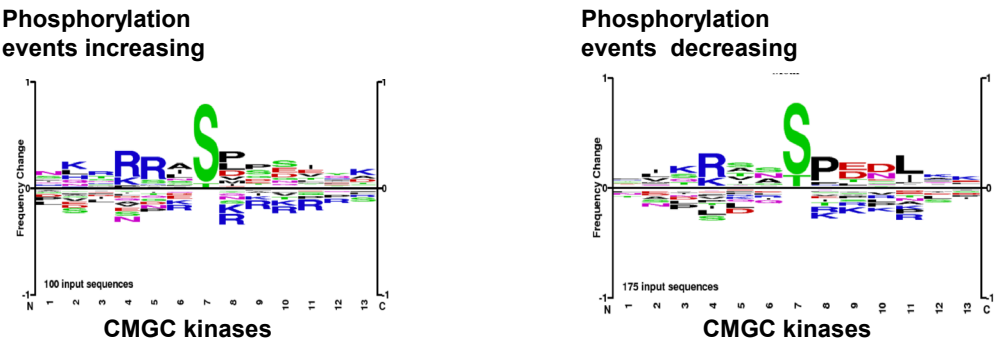

(C)

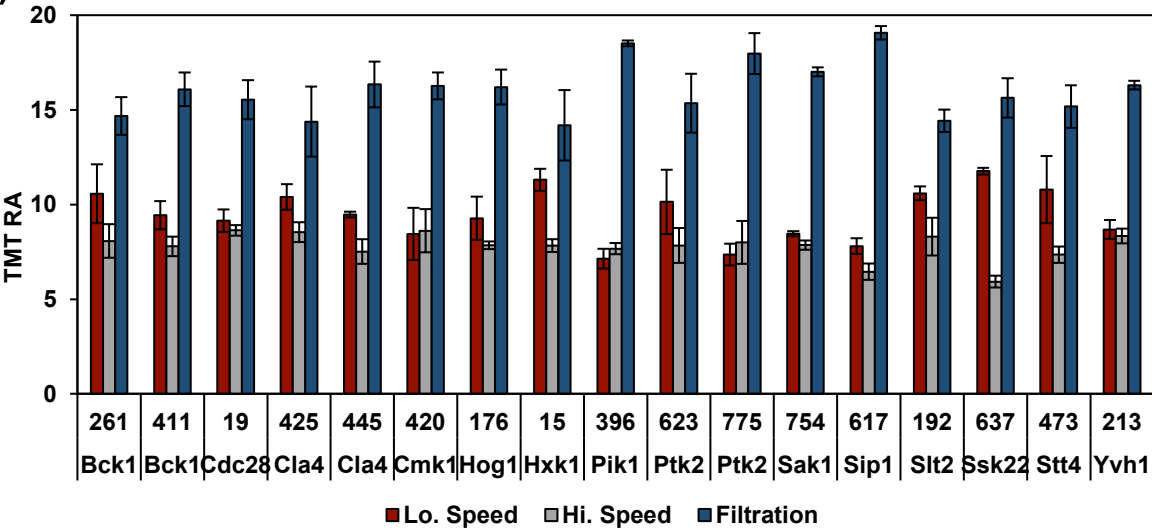

(D)

Kinase inactivation: Phosphorylation outside of the activation loop

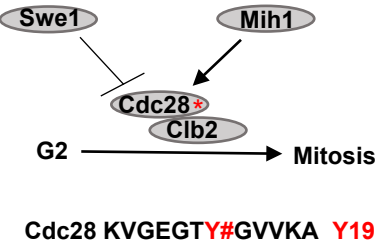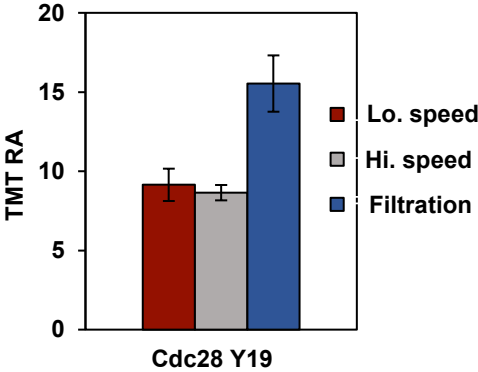

Supplement: s1 [file s1]
